# Supplementary material
Source: PubMed Central journal article supplement (PMC2789639)

Figure S1

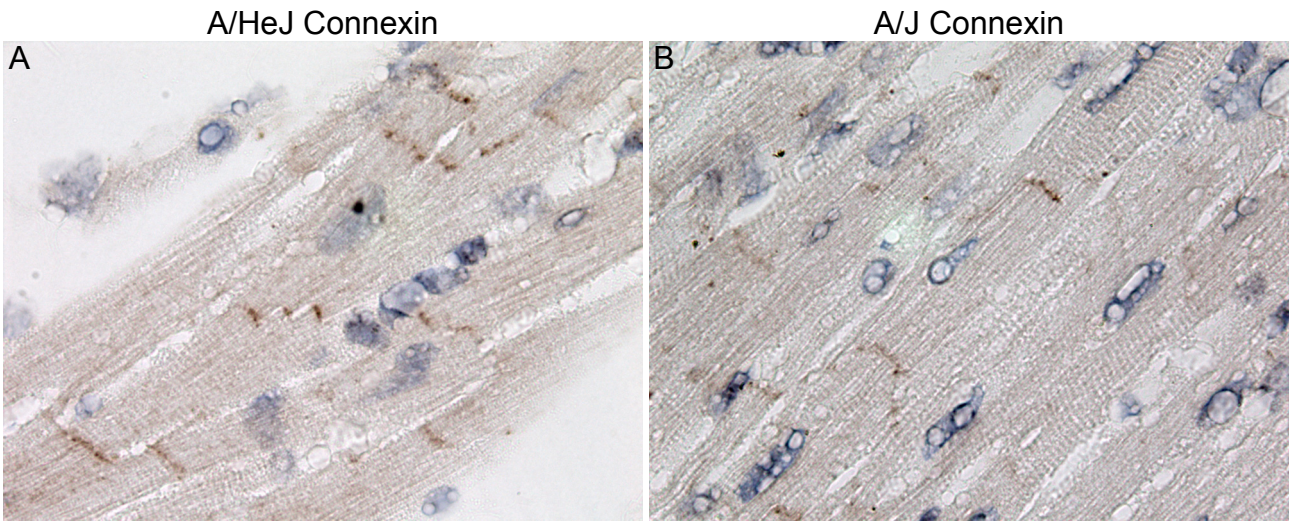

Supplement: ajpath.2009.080930_1.pdf [file ajpath.2009.080930_1.pdf]
